# Supplementary material
Source: Springer Nature journal article supplement (https://www.springermedizin.de/resource/supplementary/13012_2013_654_MOESM1_ESM.pdf/9630442)
Supplement: MOESM1 [file 9630442]

**REDUCING CVC  
BLOODSTREAM  
INFECTIONS**

**Collect and  
submit data**

Reporting infections in critical  
care (RICC)

**Technical  
interventions**

CVC insertion checklist

CVC trolley inventory

CVC-BSI fact sheet

DH high impact interventions

**Non-technical  
interventions**

Science of safety

Learning from incidents

Communications and  
teamwork

Executive and clinical  
partnerships
